# Supplementary material
Source: ML conference proceedings conference paper supplement (https://openreview.net/forum?id=8ZL7Jh1r8WX)

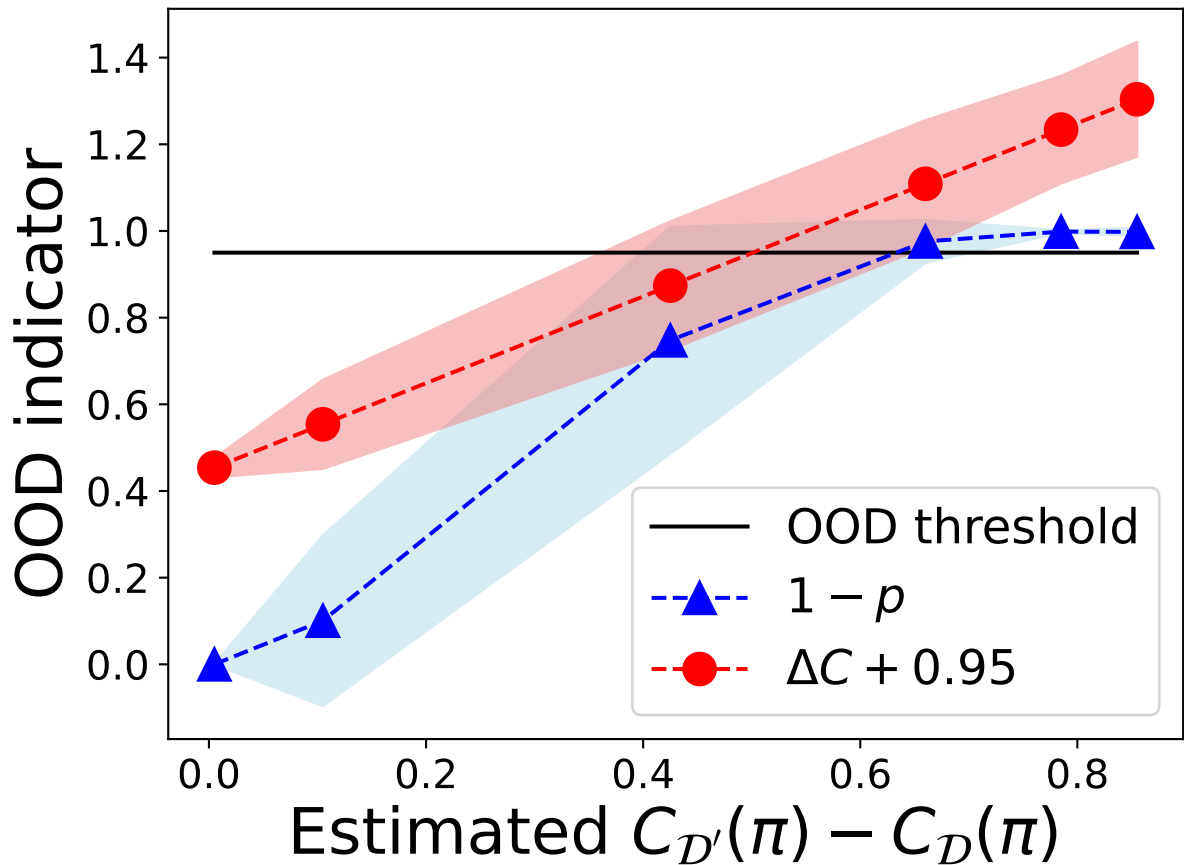

Supplement: supplementary_material [file attachment]

OOD indicator

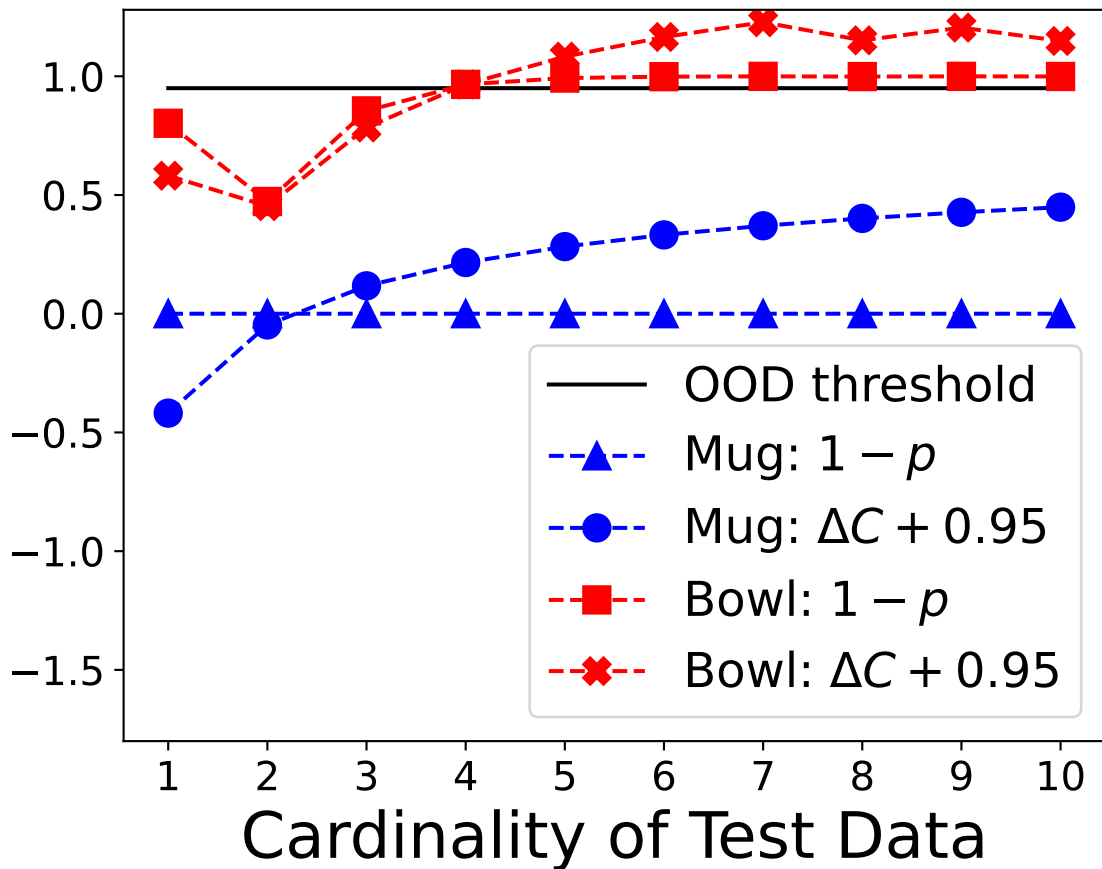

Supplement: supplementary_material [file attachment]
